# Supplementary material for: Computational biology and in vitro studies for anticipating cancer-related molecular targets of sweet wormwood (Artemisia annua)
Source: BMC Complement Med Ther. 2023 Sep 8;23:312. doi: 10.1186/s12906-023-04135-0 (PMC10492370; doi:10.1186/s12906-023-04135-0)
Supplement: Supplementary file 8 — Supplementary Material 8: Table S2: Protein-Protein interactions retrieved from String database. [file 12906_2023_4135_MOESM8_ESM.tsv]

#node1	node2	node1_string_internal_id	node2_string_internal_id	node1_external_id	node2_external_id	neighborhood_on_chromosome	gene_fusion	phylogenetic_cooccurrence	homology	coexpression	experimentally_determined_interaction	database_annotated	automated_textmining	prediction	combined_score
HSP90AA1	EGFR	1851814	1846445	9606.ENSP00000335153	9606.ENSP00000275493	0	0	0	0	0	0.990	0.900	0.932	0	0.999
CCNE1	CDKN1B	1845190	1843169	9606.ENSP00000262643	9606.ENSP00000228872	0	0	0	0	0	0.999	0.900	0.914	0	0.999
HSP90AA1	CDC37	1851814	1842879	9606.ENSP00000335153	9606.ENSP00000222005	0	0	0	0	0.071	0.999	0.900	0.968	0	0.999
VEGFA	KDR	1855611	1845437	9606.ENSP00000361125	9606.ENSP00000263923	0	0	0	0	0	0.999	0.900	0.986	0	0.999
TGFBR1	TGFBR2	1856216	1853779	9606.ENSP00000364133	9606.ENSP00000351905	0	0	0	0.808	0.077	0.999	0.900	0.977	0	0.999
JAK2	PTPN11	1857411	1852389	9606.ENSP00000371067	9606.ENSP00000340944	0	0	0	0	0	0.968	0.900	0.976	0	0.999
CCNE1	CDKN1A	1845190	1843736	9606.ENSP00000262643	9606.ENSP00000244741	0	0	0	0	0	0.999	0.900	0.912	0	0.999
HSP90AA1	PTGES3	1851814	1845046	9606.ENSP00000335153	9606.ENSP00000262033	0	0	0	0	0.562	0.999	0.900	0.981	0	0.999
HSP90AA1	ESR1	1851814	1842435	9606.ENSP00000335153	9606.ENSP00000206249	0	0	0	0	0	0.999	0	0.688	0	0.999
JUN	MAPK8	1855436	1853988	9606.ENSP00000360266	9606.ENSP00000353483	0	0	0	0	0	0.999	0.900	0.996	0	0.999
HSP90AA1	AHSA1	1851814	1842603	9606.ENSP00000335153	9606.ENSP00000216479	0	0	0	0	0.754	0.999	0	0.984	0	0.999
HIF1A	HSP90AA1	1852062	1851814	9606.ENSP00000338018	9606.ENSP00000335153	0	0	0	0	0	0.999	0.900	0.921	0	0.999
HSP90AA1	STIP1	1851814	1848791	9606.ENSP00000335153	9606.ENSP00000305958	0	0	0	0	0.939	0.999	0	0.990	0	0.999
CDK2	CCNE1	1845906	1845190	9606.ENSP00000266970	9606.ENSP00000262643	0	0	0	0	0.097	0.999	0.900	0.987	0	0.999
CDK2	CDKN1B	1845906	1843169	9606.ENSP00000266970	9606.ENSP00000228872	0	0	0	0	0	0.999	0.900	0.993	0	0.999
HSP90AA1	TERT	1851814	1849199	9606.ENSP00000335153	9606.ENSP00000309572	0	0	0	0	0	0.997	0.900	0.488	0	0.999
SUGT1	HSP90AA1	1856790	1851814	9606.ENSP00000367208	9606.ENSP00000335153	0	0	0	0	0.959	0.999	0.800	0.976	0	0.999
CDK2	CDKN1A	1845906	1843736	9606.ENSP00000266970	9606.ENSP00000244741	0	0	0	0	0	0.999	0.900	0.994	0	0.999
PTPN11	EGFR	1852389	1846445	9606.ENSP00000340944	9606.ENSP00000275493	0	0	0	0	0	0.957	0.900	0.982	0	0.999
MDM2	CDKN1A	1861282	1843736	9606.ENSP00000417281	9606.ENSP00000244741	0	0	0	0	0	0.997	0	0.731	0	0.999
CHEK1	ATR	1859362	1852735	9606.ENSP00000388648	9606.ENSP00000343741	0	0	0	0	0	0.999	0.900	0.989	0	0.999
VEGFA	HIF1A	1855611	1852062	9606.ENSP00000361125	9606.ENSP00000338018	0	0	0	0	0	0.961	0.900	0.974	0	0.999
IGF1R	ESR1	1845984	1842435	9606.ENSP00000268035	9606.ENSP00000206249	0	0	0	0	0	0.963	0.900	0.939	0	0.999
PTPN11	IGF1R	1852389	1845984	9606.ENSP00000340944	9606.ENSP00000268035	0	0	0	0	0	0.917	0.900	0.905	0	0.999
JUN	ESR1	1855436	1842435	9606.ENSP00000360266	9606.ENSP00000206249	0	0	0	0	0	0.808	0.900	0.943	0	0.998
ESR2	ESR1	1852756	1842435	9606.ENSP00000343925	9606.ENSP00000206249	0	0	0	0.935	0	0.988	0.900	0.981	0	0.998
MAPK8	CDKN1A	1853988	1843736	9606.ENSP00000353483	9606.ENSP00000244741	0	0	0	0	0	0.808	0.900	0.910	0	0.998
EGFR	ESR1	1846445	1842435	9606.ENSP00000275493	9606.ENSP00000206249	0	0	0	0	0	0.924	0	0.973	0	0.997
JUN	CDKN1A	1855436	1843736	9606.ENSP00000360266	9606.ENSP00000244741	0	0	0	0	0	0.566	0.900	0.941	0	0.997
STIP1	AHSA1	1848791	1842603	9606.ENSP00000305958	9606.ENSP00000216479	0	0	0	0	0.975	0.321	0	0.796	0	0.996
MDM2	IGF1R	1861282	1845984	9606.ENSP00000417281	9606.ENSP00000268035	0	0	0	0	0	0.974	0.800	0.357	0	0.996
PTPN11	KDR	1852389	1845437	9606.ENSP00000340944	9606.ENSP00000263923	0	0	0	0	0	0.583	0.900	0.926	0	0.996
IL1B	NFKB1	1845335	1843094	9606.ENSP00000263341	9606.ENSP00000226574	0	0	0	0	0.114	0	0.900	0.963	0	0.996
TERT	PTGES3	1849199	1845046	9606.ENSP00000309572	9606.ENSP00000262033	0	0	0	0	0	0.962	0.900	0.047	0	0.996
HSP90AA1	KDR	1851814	1845437	9606.ENSP00000335153	9606.ENSP00000263923	0	0	0	0	0	0.600	0.900	0.904	0	0.995
JUN	MMP2	1855436	1842719	9606.ENSP00000360266	9606.ENSP00000219070	0	0	0	0	0	0	0.900	0.956	0	0.995
MDM2	HIF1A	1861282	1852062	9606.ENSP00000417281	9606.ENSP00000338018	0	0	0	0	0	0.917	0.900	0.400	0	0.994
PPARG	ESR1	1847090	1842435	9606.ENSP00000287820	9606.ENSP00000206249	0	0	0	0.651	0	0.915	0.900	0.639	0	0.993
CDKN1A	CDKN1B	1843736	1843169	9606.ENSP00000244741	9606.ENSP00000228872	0	0	0	0.764	0	0.920	0.900	0.920	0	0.993
VEGFA	MMP2	1855611	1842719	9606.ENSP00000361125	9606.ENSP00000219070	0	0	0	0	0	0	0.800	0.960	0	0.991
TLR2	NFKB1	1844747	1843094	9606.ENSP00000260010	9606.ENSP00000226574	0	0	0	0	0	0.101	0.800	0.953	0	0.991
VEGFA	EGFR	1855611	1846445	9606.ENSP00000361125	9606.ENSP00000275493	0	0	0	0	0	0	0.800	0.960	0	0.991
ATR	CDK2	1852735	1845906	9606.ENSP00000343741	9606.ENSP00000266970	0	0	0	0	0.065	0.757	0.900	0.655	0	0.991
JUN	HIF1A	1855436	1852062	9606.ENSP00000360266	9606.ENSP00000338018	0	0	0	0	0	0.812	0.900	0.606	0	0.991
CXCL12	HIF1A	1858332	1852062	9606.ENSP00000379140	9606.ENSP00000338018	0	0	0	0	0	0	0.900	0.912	0	0.990
CYP1A1	GSTM1	1857086	1849425	9606.ENSP00000369050	9606.ENSP00000311469	0	0	0	0	0	0	0.900	0.909	0	0.990
JUN	PTGS2	1855436	1854602	9606.ENSP00000360266	9606.ENSP00000356438	0	0	0	0	0	0	0.900	0.899	0	0.989
CXCL12	JAK2	1858332	1857411	9606.ENSP00000379140	9606.ENSP00000371067	0	0	0	0	0	0	0.900	0.891	0	0.988
STIP1	PTGES3	1848791	1845046	9606.ENSP00000305958	9606.ENSP00000262033	0	0	0	0	0.736	0.718	0	0.816	0	0.985
CHEK1	HSP90AA1	1859362	1851814	9606.ENSP00000388648	9606.ENSP00000335153	0	0	0	0	0.070	0.831	0	0.909	0	0.984
EGFR	CDC37	1846445	1842879	9606.ENSP00000275493	9606.ENSP00000222005	0	0	0	0	0	0.812	0.900	0.193	0	0.983
CHEK1	CDK2	1859362	1845906	9606.ENSP00000388648	9606.ENSP00000266970	0	0	0.449	0.744	0.125	0.726	0.900	0.968	0	0.982
JUN	IL1B	1855436	1845335	9606.ENSP00000360266	9606.ENSP00000263341	0	0	0	0	0	0	0.800	0.913	0	0.981
MDM2	ESR1	1861282	1842435	9606.ENSP00000417281	9606.ENSP00000206249	0	0	0	0	0	0.962	0	0.472	0	0.979
TGFBR1	XIAP	1856216	1853225	9606.ENSP00000364133	9606.ENSP00000347858	0	0	0	0	0	0.576	0.900	0.530	0	0.978
SUGT1	PTGES3	1856790	1845046	9606.ENSP00000367208	9606.ENSP00000262033	0	0	0	0	0.738	0.808	0	0.607	0	0.978
MDM2	CHEK1	1861282	1859362	9606.ENSP00000417281	9606.ENSP00000388648	0	0	0	0	0	0.569	0.900	0.536	0	0.978
VEGFA	HSP90AA1	1855611	1851814	9606.ENSP00000361125	9606.ENSP00000335153	0	0	0	0	0	0.576	0.900	0.509	0	0.977
PPARG	NFKB1	1847090	1843094	9606.ENSP00000287820	9606.ENSP00000226574	0	0	0	0	0	0	0.900	0.751	0	0.974
CHEK1	CDKN1A	1859362	1843736	9606.ENSP00000388648	9606.ENSP00000244741	0	0	0	0	0	0.566	0	0.937	0	0.971
CDKN1A	ESR1	1843736	1842435	9606.ENSP00000244741	9606.ENSP00000206249	0	0	0	0	0	0.915	0	0.658	0	0.969
HSP90AA1	IGF1R	1851814	1845984	9606.ENSP00000335153	9606.ENSP00000268035	0	0	0	0	0	0.277	0	0.958	0	0.969
CXCL12	MMP2	1858332	1842719	9606.ENSP00000379140	9606.ENSP00000219070	0	0	0	0	0	0.576	0	0.926	0	0.967
VEGFA	JUN	1855611	1855436	9606.ENSP00000361125	9606.ENSP00000360266	0	0	0	0	0	0.149	0.900	0.643	0	0.966
JUN	EGFR	1855436	1846445	9606.ENSP00000360266	9606.ENSP00000275493	0	0	0	0	0	0.228	0	0.955	0	0.964
JAK2	NFKB1	1857411	1843094	9606.ENSP00000371067	9606.ENSP00000226574	0	0	0	0	0	0.110	0.900	0.625	0	0.963
JUN	CDKN1B	1855436	1843169	9606.ENSP00000360266	9606.ENSP00000228872	0	0	0	0	0	0	0.900	0.653	0	0.963
ESR2	PPARG	1852756	1847090	9606.ENSP00000343925	9606.ENSP00000287820	0	0	0	0.636	0	0.567	0.900	0.472	0	0.962
MAPK8	MMP2	1853988	1842719	9606.ENSP00000353483	9606.ENSP00000219070	0	0	0	0	0	0	0	0.962	0	0.962
IL1B	MMP2	1845335	1842719	9606.ENSP00000263341	9606.ENSP00000219070	0	0	0	0	0.066	0.576	0	0.910	0	0.961
VEGFA	iloprost	1855611	-100054313	9606.ENSP00000361125	-1.CID100054313	0	0	0	0	0	0	0	0.960	0	0.960
HIF1A	KDR	1852062	1845437	9606.ENSP00000338018	9606.ENSP00000263923	0	0	0	0	0	0	0	0.959	0	0.960
PTGS2	PTGES3	1854602	1845046	9606.ENSP00000356438	9606.ENSP00000262033	0	0	0	0	0	0	0.900	0.585	0	0.956
PTPN11	MAP2K1	1852389	1848411	9606.ENSP00000340944	9606.ENSP00000302486	0	0	0	0	0	0.283	0.900	0.445	0	0.956
MAPK8	PPARG	1853988	1847090	9606.ENSP00000353483	9606.ENSP00000287820	0	0	0	0	0	0.576	0	0.896	0	0.954
MDM2	CDK2	1861282	1845906	9606.ENSP00000417281	9606.ENSP00000266970	0	0	0	0	0	0	0.900	0.560	0	0.954
SUGT1	AHSA1	1856790	1842603	9606.ENSP00000367208	9606.ENSP00000216479	0	0	0	0	0.796	0.582	0	0.494	0	0.953
JAK2	HSP90AA1	1857411	1851814	9606.ENSP00000371067	9606.ENSP00000335153	0	0	0	0	0	0.593	0	0.886	0	0.952
CXCL12	VEGFA	1858332	1855611	9606.ENSP00000379140	9606.ENSP00000361125	0	0	0	0	0	0	0	0.949	0	0.949
MDM2	HSP90AA1	1861282	1851814	9606.ENSP00000417281	9606.ENSP00000335153	0	0	0	0	0	0.924	0	0.362	0	0.949
TERT	ESR1	1849199	1842435	9606.ENSP00000309572	9606.ENSP00000206249	0	0	0	0	0	0	0.900	0.503	0	0.948
TGFBR1	HSP90AA1	1856216	1851814	9606.ENSP00000364133	9606.ENSP00000335153	0	0	0	0	0	0.933	0	0.248	0	0.948
TERT	EGFR	1849199	1846445	9606.ENSP00000309572	9606.ENSP00000275493	0	0	0	0	0	0	0.900	0.509	0	0.948
JAK2	CDKN1B	1857411	1843169	9606.ENSP00000371067	9606.ENSP00000228872	0	0	0	0	0	0.576	0	0.880	0	0.947
HSP90AA1	MMP2	1851814	1842719	9606.ENSP00000335153	9606.ENSP00000219070	0	0	0	0	0	0.576	0	0.878	0	0.946
HIF1A	CDKN1A	1852062	1843736	9606.ENSP00000338018	9606.ENSP00000244741	0	0	0	0	0	0	0.900	0.478	0	0.945
PTGS2	NFKB1	1854602	1843094	9606.ENSP00000356438	9606.ENSP00000226574	0	0	0	0	0	0	0	0.945	0	0.945
MAPK8	MAP2K1	1853988	1848411	9606.ENSP00000353483	9606.ENSP00000302486	0	0	0.307	0.641	0	0.572	0.800	0.907	0	0.945
CXCL12	ESR1	1858332	1842435	9606.ENSP00000379140	9606.ENSP00000206249	0	0	0	0	0	0	0.900	0.472	0	0.944
MAP2K1	NFKB1	1848411	1843094	9606.ENSP00000302486	9606.ENSP00000226574	0	0	0	0	0	0.107	0.900	0.410	0	0.942
VEGFA	PTPN11	1855611	1852389	9606.ENSP00000361125	9606.ENSP00000340944	0	0	0	0	0	0	0.900	0.418	0	0.939
CYP1A1	CYP19A1	1857086	1844790	9606.ENSP00000369050	9606.ENSP00000260433	0	0	0.526	0.623	0	0	0.900	0.680	0	0.939
TERT	CDKN1B	1849199	1843169	9606.ENSP00000309572	9606.ENSP00000228872	0	0	0	0	0	0	0.900	0.417	0	0.939
JUN	TERT	1855436	1849199	9606.ENSP00000360266	9606.ENSP00000309572	0	0	0	0	0	0	0.900	0.419	0	0.939
PARP1	CDKN1A	1854450	1843736	9606.ENSP00000355759	9606.ENSP00000244741	0	0	0	0	0	0.912	0	0.324	0	0.938
TERT	NFKB1	1849199	1843094	9606.ENSP00000309572	9606.ENSP00000226574	0	0	0	0	0	0	0.900	0.398	0	0.937
JUN	PTPN11	1855436	1852389	9606.ENSP00000360266	9606.ENSP00000340944	0	0	0	0	0	0	0	0.935	0	0.935
EGFR	NFKB1	1846445	1843094	9606.ENSP00000275493	9606.ENSP00000226574	0	0	0	0	0	0.099	0	0.929	0	0.934
JAK2	IL1B	1857411	1845335	9606.ENSP00000371067	9606.ENSP00000263341	0	0	0	0	0	0	0.900	0.359	0	0.933
MITF	CDKN1A	1847592	1843736	9606.ENSP00000295600	9606.ENSP00000244741	0	0	0	0	0	0	0.900	0.359	0	0.933
STIP1	CDC37	1848791	1842879	9606.ENSP00000305958	9606.ENSP00000222005	0	0	0	0	0.118	0.805	0	0.629	0	0.931
HIF1A	TERT	1852062	1849199	9606.ENSP00000338018	9606.ENSP00000309572	0	0	0	0	0	0	0.900	0.330	0	0.930
NFKB1	MMP2	1843094	1842719	9606.ENSP00000226574	9606.ENSP00000219070	0	0	0	0	0	0	0	0.928	0	0.928
CYP1A1	ESR1	1857086	1842435	9606.ENSP00000369050	9606.ENSP00000206249	0	0	0	0	0	0	0	0.928	0	0.928
CXCL12	PTPN11	1858332	1852389	9606.ENSP00000379140	9606.ENSP00000340944	0	0	0	0	0	0	0.900	0.296	0	0.926
NFKB1	ESR1	1843094	1842435	9606.ENSP00000226574	9606.ENSP00000206249	0	0	0	0	0	0.812	0	0.625	0	0.926
PTGES3	ESR1	1845046	1842435	9606.ENSP00000262033	9606.ENSP00000206249	0	0	0	0	0	0.914	0	0.141	0	0.923
HIF1A	ABCG2	1852062	1843466	9606.ENSP00000338018	9606.ENSP00000237612	0	0	0	0	0	0	0.900	0.268	0	0.923
SUGT1	CDC37	1856790	1842879	9606.ENSP00000367208	9606.ENSP00000222005	0	0	0	0	0.113	0.858	0	0.424	0	0.921
JUN	CDK2	1855436	1845906	9606.ENSP00000360266	9606.ENSP00000266970	0	0	0	0	0	0.337	0	0.882	0	0.919
HIF1A	EGFR	1852062	1846445	9606.ENSP00000338018	9606.ENSP00000275493	0	0	0	0	0	0	0	0.918	0	0.918
CXCL12	MAP2K1	1858332	1848411	9606.ENSP00000379140	9606.ENSP00000302486	0	0	0	0	0	0	0.900	0.195	0	0.916
HIF1A	MMP2	1852062	1842719	9606.ENSP00000338018	9606.ENSP00000219070	0	0	0	0	0	0	0	0.916	0	0.916
VEGFA	ESR1	1855611	1842435	9606.ENSP00000361125	9606.ENSP00000206249	0	0	0	0	0	0	0	0.913	0	0.913
VEGFA	IGF1R	1855611	1845984	9606.ENSP00000361125	9606.ENSP00000268035	0	0	0	0	0	0	0.800	0.586	0	0.913
FGFR1	VEGFA	1859710	1855611	9606.ENSP00000393312	9606.ENSP00000361125	0	0	0	0	0	0	0.800	0.584	0	0.913
MDM2	ATR	1861282	1852735	9606.ENSP00000417281	9606.ENSP00000343741	0	0	0	0	0	0	0.900	0.160	0	0.912
CYP19A1	ESR1	1844790	1842435	9606.ENSP00000260433	9606.ENSP00000206249	0	0	0	0	0	0	0	0.911	0	0.911
VEGFA	PPARG	1855611	1847090	9606.ENSP00000361125	9606.ENSP00000287820	0	0	0	0	0	0	0	0.909	0	0.909
PTGS2	IL1B	1854602	1845335	9606.ENSP00000356438	9606.ENSP00000263341	0	0	0	0	0	0	0	0.908	0	0.908
PTPN11	CDKN1B	1852389	1843169	9606.ENSP00000340944	9606.ENSP00000228872	0	0	0	0	0	0	0	0.905	0	0.905
PARP1	NFKB1	1854450	1843094	9606.ENSP00000355759	9606.ENSP00000226574	0	0	0	0	0	0.819	0	0.491	0	0.904
JAK2	EGFR	1857411	1846445	9606.ENSP00000371067	9606.ENSP00000275493	0	0	0	0.630	0	0.851	0	0.962	0	0.904
TGFBR2	XIAP	1853779	1853225	9606.ENSP00000351905	9606.ENSP00000347858	0	0	0	0	0	0	0.900	0.081	0	0.904
PPARG	IL1B	1847090	1845335	9606.ENSP00000287820	9606.ENSP00000263341	0	0	0	0	0	0	0	0.903	0	0.903
VEGFA	IL1B	1855611	1845335	9606.ENSP00000361125	9606.ENSP00000263341	0	0	0	0	0	0	0	0.903	0	0.903
PTGES3	CDKN1B	1845046	1843169	9606.ENSP00000262033	9606.ENSP00000228872	0	0	0	0	0	0	0.900	0.041	0	0.900
MDM2	EGFR	1861282	1846445	9606.ENSP00000417281	9606.ENSP00000275493	0	0	0	0	0	0	0.800	0.513	0	0.898
IGF1R	MMP2	1845984	1842719	9606.ENSP00000268035	9606.ENSP00000219070	0	0	0	0	0	0	0	0.896	0	0.896
ESR2	IGF1R	1852756	1845984	9606.ENSP00000343925	9606.ENSP00000268035	0	0	0	0	0	0.063	0	0.890	0	0.893
VEGFA	MAPK8	1855611	1853988	9606.ENSP00000361125	9606.ENSP00000353483	0	0	0	0	0	0	0	0.890	0	0.890
PTGS2	EGFR	1854602	1846445	9606.ENSP00000356438	9606.ENSP00000275493	0	0	0	0	0	0	0	0.889	0	0.889
PTGS2	PPARG	1854602	1847090	9606.ENSP00000356438	9606.ENSP00000287820	0	0	0	0	0	0	0	0.889	0	0.889
JUN	ESR2	1855436	1852756	9606.ENSP00000360266	9606.ENSP00000343925	0	0	0	0	0	0	0.800	0.472	0	0.889
HSP90AA1	CDK2	1851814	1845906	9606.ENSP00000335153	9606.ENSP00000266970	0	0	0	0	0	0.655	0	0.687	0	0.887
TGFBR2	HSP90AA1	1853779	1851814	9606.ENSP00000351905	9606.ENSP00000335153	0	0	0	0	0	0.859	0	0.227	0	0.887
MDM2	XIAP	1861282	1853225	9606.ENSP00000417281	9606.ENSP00000347858	0	0	0	0	0	0.812	0	0.413	0	0.885
VEGFA	PTGS2	1855611	1854602	9606.ENSP00000361125	9606.ENSP00000356438	0	0	0	0	0	0	0	0.885	0	0.885
EGFR	IGF1R	1846445	1845984	9606.ENSP00000275493	9606.ENSP00000268035	0	0	0	0.625	0	0.819	0	0.969	0	0.884
CDK2	CDC37	1845906	1842879	9606.ENSP00000266970	9606.ENSP00000222005	0	0	0	0	0	0.712	0	0.587	0	0.876
PARP1	MAPK8	1854450	1853988	9606.ENSP00000355759	9606.ENSP00000353483	0	0	0	0	0	0	0	0.874	0	0.874
TLR2	MMP2	1844747	1842719	9606.ENSP00000260010	9606.ENSP00000219070	0	0	0	0	0	0	0	0.873	0	0.873
EGFR	CYP19A1	1846445	1844790	9606.ENSP00000275493	9606.ENSP00000260433	0	0	0	0	0	0	0	0.871	0	0.871
PTGS2	TLR2	1854602	1844747	9606.ENSP00000356438	9606.ENSP00000260010	0	0	0	0	0	0	0	0.868	0	0.868
HIF1A	IL1B	1852062	1845335	9606.ENSP00000338018	9606.ENSP00000263341	0	0	0	0	0	0	0	0.866	0	0.866
PTGES3	AHSA1	1845046	1842603	9606.ENSP00000262033	9606.ENSP00000216479	0	0	0	0	0.665	0	0	0.618	0	0.866
PTGS2	HIF1A	1854602	1852062	9606.ENSP00000356438	9606.ENSP00000338018	0	0	0	0	0	0	0	0.862	0	0.862
PPARG	ABCG2	1847090	1843466	9606.ENSP00000287820	9606.ENSP00000237612	0	0	0	0	0	0	0	0.852	0	0.852
HIF1A	TLR2	1852062	1844747	9606.ENSP00000338018	9606.ENSP00000260010	0	0	0	0	0	0	0	0.852	0	0.852
MDM2	KDR	1861282	1845437	9606.ENSP00000417281	9606.ENSP00000263923	0	0	0	0	0	0	0.800	0.263	0	0.846
ESR2	HIF1A	1852756	1852062	9606.ENSP00000343925	9606.ENSP00000338018	0	0	0	0	0	0	0	0.845	0	0.845
JUN	NFKB1	1855436	1843094	9606.ENSP00000360266	9606.ENSP00000226574	0	0	0	0	0.077	0	0	0.836	0	0.842
IL1B	CDKN1A	1845335	1843736	9606.ENSP00000263341	9606.ENSP00000244741	0	0	0	0	0	0	0	0.834	0	0.834
EGFR	TLR2	1846445	1844747	9606.ENSP00000275493	9606.ENSP00000260010	0	0	0	0	0	0.749	0	0.358	0	0.832
TGFBR2	IL1B	1853779	1845335	9606.ENSP00000351905	9606.ENSP00000263341	0	0	0	0	0	0	0	0.830	0	0.830
PTPN11	TERT	1852389	1849199	9606.ENSP00000340944	9606.ENSP00000309572	0	0	0	0	0	0	0	0.829	0	0.829
IGF1R	IL1B	1845984	1845335	9606.ENSP00000268035	9606.ENSP00000263341	0	0	0	0	0	0	0	0.826	0	0.826
PTGS2	CDK2	1854602	1845906	9606.ENSP00000356438	9606.ENSP00000266970	0	0	0	0	0	0	0	0.820	0	0.820
EGFR	CDKN1A	1846445	1843736	9606.ENSP00000275493	9606.ENSP00000244741	0	0	0	0	0	0	0	0.807	0	0.808
HSP90AA1	MAP2K1	1851814	1848411	9606.ENSP00000335153	9606.ENSP00000302486	0	0	0	0	0	0	0	0.803	0	0.803
PPARG	1,2-propanediol	1847090	-100001030	9606.ENSP00000287820	-1.CID100001030	0	0	0	0	0	0.800	0	0	0	0.800
ESR2	CYP19A1	1852756	1844790	9606.ENSP00000343925	9606.ENSP00000260433	0	0	0	0	0	0	0	0.798	0	0.798
JUN	HSP90AA1	1855436	1851814	9606.ENSP00000360266	9606.ENSP00000335153	0	0	0	0	0	0.247	0	0.740	0	0.796
CDC37	AHSA1	1842879	1842603	9606.ENSP00000222005	9606.ENSP00000216479	0	0	0	0	0.081	0.371	0	0.669	0	0.792
MAP2K1	EGFR	1848411	1846445	9606.ENSP00000302486	9606.ENSP00000275493	0	0	0	0.648	0	0.707	0	0.730	0	0.781
HSP90AA1	CDKN1A	1851814	1843736	9606.ENSP00000335153	9606.ENSP00000244741	0	0	0	0	0	0.564	0	0.506	0	0.775
MAPK8	NFKB1	1853988	1843094	9606.ENSP00000353483	9606.ENSP00000226574	0	0	0	0	0	0	0	0.773	0	0.773
MAPK8	CDKN1B	1853988	1843169	9606.ENSP00000353483	9606.ENSP00000228872	0	0	0	0	0	0.564	0	0.499	0	0.772
PTGS2	MAPK8	1854602	1853988	9606.ENSP00000356438	9606.ENSP00000353483	0	0	0	0	0	0	0	0.768	0	0.768
FGFR1	MMP2	1859710	1842719	9606.ENSP00000393312	9606.ENSP00000219070	0	0	0	0	0	0.576	0	0.457	0	0.759
ATR	KDR	1852735	1845437	9606.ENSP00000343741	9606.ENSP00000263923	0	0	0	0	0	0.588	0	0.420	0	0.751
ESR2	HSP90AA1	1852756	1851814	9606.ENSP00000343925	9606.ENSP00000335153	0	0	0	0	0	0.593	0	0.386	0	0.740
MITF	CDK2	1847592	1845906	9606.ENSP00000295600	9606.ENSP00000266970	0	0	0	0	0	0.576	0	0.402	0	0.736
IL1B	TLR2	1845335	1844747	9606.ENSP00000263341	9606.ENSP00000260010	0	0	0	0	0.086	0	0	0.720	0	0.733
EGFR	MMP2	1846445	1842719	9606.ENSP00000275493	9606.ENSP00000219070	0	0	0	0	0	0	0	0.730	0	0.730
CHEK1	XIAP	1859362	1853225	9606.ENSP00000388648	9606.ENSP00000347858	0	0	0	0	0	0.576	0	0.391	0	0.730
JUN	MAP2K1	1855436	1848411	9606.ENSP00000360266	9606.ENSP00000302486	0	0	0	0	0	0	0	0.724	0	0.724
MDM2	TERT	1861282	1849199	9606.ENSP00000417281	9606.ENSP00000309572	0	0	0	0	0	0.576	0	0.360	0	0.717
PARP1	ESR1	1854450	1842435	9606.ENSP00000355759	9606.ENSP00000206249	0	0	0	0	0	0.580	0	0.343	0	0.712
HSP90AA1	NFKB1	1851814	1843094	9606.ENSP00000335153	9606.ENSP00000226574	0	0	0	0	0	0.281	0	0.616	0	0.712
CDK2	NFKB1	1845906	1843094	9606.ENSP00000266970	9606.ENSP00000226574	0	0	0	0	0	0.149	0	0.671	0	0.708
CXCL12	KDR	1858332	1845437	9606.ENSP00000379140	9606.ENSP00000263923	0	0	0	0	0	0	0	0.707	0	0.707
TOP2A	JUN	1860923	1855436	9606.ENSP00000411532	9606.ENSP00000360266	0	0	0	0	0	0.576	0	0.325	0	0.701
HIF1A	NFKB1	1852062	1843094	9606.ENSP00000338018	9606.ENSP00000226574	0	0	0	0	0	0	0	0.700	0	0.700
SUGT1	STIP1	1856790	1848791	9606.ENSP00000367208	9606.ENSP00000305958	0	0	0	0	0.085	0.645	0	0.145	0	0.698
TOP2A	CHEK1	1860923	1859362	9606.ENSP00000411532	9606.ENSP00000388648	0	0	0	0	0.145	0.382	0	0.473	0	0.697
MAPK8	PTPN11	1853988	1852389	9606.ENSP00000353483	9606.ENSP00000340944	0	0	0	0	0	0.081	0	0.676	0	0.690
XIAP	NFKB1	1853225	1843094	9606.ENSP00000347858	9606.ENSP00000226574	0	0	0	0	0	0	0	0.689	0	0.689
JAK2	JUN	1857411	1855436	9606.ENSP00000371067	9606.ENSP00000360266	0	0	0	0	0	0.101	0	0.666	0	0.687
PARP1	HIF1A	1854450	1852062	9606.ENSP00000355759	9606.ENSP00000338018	0	0	0	0	0	0.576	0	0.270	0	0.677
ESR2	EGFR	1852756	1846445	9606.ENSP00000343925	9606.ENSP00000275493	0	0	0	0	0	0.149	0	0.636	0	0.676
EGFR	CDKN1B	1846445	1843169	9606.ENSP00000275493	9606.ENSP00000228872	0	0	0	0	0	0	0	0.666	0	0.666
KDR	MMP2	1845437	1842719	9606.ENSP00000263923	9606.ENSP00000219070	0	0	0	0	0	0	0	0.658	0	0.658
FGFR1	JAK2	1859710	1857411	9606.ENSP00000393312	9606.ENSP00000371067	0	0	0	0.653	0	0.581	0	0.543	0	0.657
JAK2	IGF1R	1857411	1845984	9606.ENSP00000371067	9606.ENSP00000268035	0	0	0	0.624	0	0.566	0	0.562	0	0.654
ATR	HSP90AA1	1852735	1851814	9606.ENSP00000343741	9606.ENSP00000335153	0	0	0	0	0	0.566	0	0.232	0	0.652
MDM2	ESR2	1861282	1852756	9606.ENSP00000417281	9606.ENSP00000343925	0	0	0	0	0	0.576	0	0.210	0	0.650
VEGFA	NFKB1	1855611	1843094	9606.ENSP00000361125	9606.ENSP00000226574	0	0	0	0	0	0	0	0.649	0	0.649
TOP2A	HSP90AA1	1860923	1851814	9606.ENSP00000411532	9606.ENSP00000335153	0.068	0	0	0	0.071	0	0	0.626	0	0.648
CDK2	ESR1	1845906	1842435	9606.ENSP00000266970	9606.ENSP00000206249	0	0	0	0	0	0	0	0.648	0	0.648
MAPK8	XIAP	1853988	1853225	9606.ENSP00000353483	9606.ENSP00000347858	0	0	0	0	0	0	0	0.638	0	0.638
PTGES3	CDC37	1845046	1842879	9606.ENSP00000262033	9606.ENSP00000222005	0	0	0	0	0.111	0.231	0	0.507	0	0.633
JUN	PPARG	1855436	1847090	9606.ENSP00000360266	9606.ENSP00000287820	0	0	0	0	0	0	0	0.633	0	0.633
MAPK8	EGFR	1853988	1846445	9606.ENSP00000353483	9606.ENSP00000275493	0	0	0	0.622	0	0.425	0	0.939	0	0.628
CDKN1B	ESR1	1843169	1842435	9606.ENSP00000228872	9606.ENSP00000206249	0	0	0	0	0	0	0	0.624	0	0.624
JUN	TLR2	1855436	1844747	9606.ENSP00000360266	9606.ENSP00000260010	0	0	0	0	0	0	0	0.606	0	0.606
JUN	XIAP	1855436	1853225	9606.ENSP00000360266	9606.ENSP00000347858	0	0	0	0	0	0	0	0.606	0	0.606
JUN	IGF1R	1855436	1845984	9606.ENSP00000360266	9606.ENSP00000268035	0	0	0	0	0	0.077	0	0.581	0	0.597
EGFR	KDR	1846445	1845437	9606.ENSP00000275493	9606.ENSP00000263923	0	0	0	0.621	0	0.360	0	0.966	0	0.594
CDKN1A	NFKB1	1843736	1843094	9606.ENSP00000244741	9606.ENSP00000226574	0	0	0	0	0	0	0	0.585	0	0.585
HIF1A	PTGES3	1852062	1845046	9606.ENSP00000338018	9606.ENSP00000262033	0	0	0	0	0	0.567	0	0.068	0	0.579
FGFR1	PTPN11	1859710	1852389	9606.ENSP00000393312	9606.ENSP00000340944	0	0	0	0	0	0.083	0	0.559	0	0.578
PTGS2	CYP19A1	1854602	1844790	9606.ENSP00000356438	9606.ENSP00000260433	0	0	0	0	0	0	0	0.577	0	0.577
MDM2	JUN	1861282	1855436	9606.ENSP00000417281	9606.ENSP00000360266	0	0	0	0	0	0.231	0	0.470	0	0.575
ATR	TERT	1852735	1849199	9606.ENSP00000343741	9606.ENSP00000309572	0	0	0	0	0	0.159	0	0.514	0	0.574
KDR	ESR1	1845437	1842435	9606.ENSP00000263923	9606.ENSP00000206249	0	0	0	0	0	0.063	0	0.563	0	0.573
CYP1A1	HSP90AA1	1857086	1851814	9606.ENSP00000369050	9606.ENSP00000335153	0	0	0	0	0	0.093	0	0.548	0	0.573
JUN	KDR	1855436	1845437	9606.ENSP00000360266	9606.ENSP00000263923	0	0	0	0	0	0.077	0	0.553	0	0.570
MAPK8	TLR2	1853988	1844747	9606.ENSP00000353483	9606.ENSP00000260010	0	0	0	0	0	0	0	0.570	0	0.570
MMP2	ESR1	1842719	1842435	9606.ENSP00000219070	9606.ENSP00000206249	0	0	0	0	0	0	0	0.569	0	0.569
EGFR	ABCG2	1846445	1843466	9606.ENSP00000275493	9606.ENSP00000237612	0	0	0	0	0	0	0	0.565	0	0.565
TERT	CDKN1A	1849199	1843736	9606.ENSP00000309572	9606.ENSP00000244741	0	0	0	0	0	0	0	0.564	0	0.564
PPARG	EGFR	1847090	1846445	9606.ENSP00000287820	9606.ENSP00000275493	0	0	0	0	0	0.149	0	0.507	0	0.562
TGFBR2	TERT	1853779	1849199	9606.ENSP00000351905	9606.ENSP00000309572	0	0	0	0	0	0.484	0	0.166	0	0.551
TOP2A	CDK2	1860923	1845906	9606.ENSP00000411532	9606.ENSP00000266970	0	0	0	0	0.167	0	0	0.480	0	0.549
MAPK8	HSP90AA1	1853988	1851814	9606.ENSP00000353483	9606.ENSP00000335153	0	0	0	0	0	0	0	0.549	0	0.549
MAPK8	IGF1R	1853988	1845984	9606.ENSP00000353483	9606.ENSP00000268035	0	0	0	0	0	0.107	0	0.514	0	0.548
HSP90AA1	TLR2	1851814	1844747	9606.ENSP00000335153	9606.ENSP00000260010	0	0	0	0	0	0.167	0	0.479	0	0.547
XIAP	EGFR	1853225	1846445	9606.ENSP00000347858	9606.ENSP00000275493	0	0	0	0	0	0	0	0.543	0	0.543
XIAP	CDK2	1853225	1845906	9606.ENSP00000347858	9606.ENSP00000266970	0	0	0	0	0	0	0	0.539	0	0.539
IGF1R	CYP19A1	1845984	1844790	9606.ENSP00000268035	9606.ENSP00000260433	0	0	0	0	0	0	0	0.536	0	0.536
KDR	NFKB1	1845437	1843094	9606.ENSP00000263923	9606.ENSP00000226574	0	0	0	0	0	0.110	0	0.500	0	0.535
VEGFA	CDKN1A	1855611	1843736	9606.ENSP00000361125	9606.ENSP00000244741	0	0	0	0	0	0	0	0.534	0	0.534
CHEK1	CCNE1	1859362	1845190	9606.ENSP00000388648	9606.ENSP00000262643	0	0	0	0	0.125	0	0	0.479	0	0.525
CDKN1B	NFKB1	1843169	1843094	9606.ENSP00000228872	9606.ENSP00000226574	0	0	0	0	0	0	0	0.517	0	0.518
XIAP	HSP90AA1	1853225	1851814	9606.ENSP00000347858	9606.ENSP00000335153	0	0	0	0	0	0	0	0.517	0	0.517
XIAP	CDKN1A	1853225	1843736	9606.ENSP00000347858	9606.ENSP00000244741	0	0	0	0	0	0	0	0.515	0	0.515
CXCL12	EGFR	1858332	1846445	9606.ENSP00000379140	9606.ENSP00000275493	0	0	0	0	0	0	0	0.513	0	0.513
HIF1A	ESR1	1852062	1842435	9606.ENSP00000338018	9606.ENSP00000206249	0	0	0	0	0	0.063	0	0.501	0	0.512
MAPK8	IL1B	1853988	1845335	9606.ENSP00000353483	9606.ENSP00000263341	0	0	0	0	0	0	0	0.511	0	0.511
CXCL12	NFKB1	1858332	1843094	9606.ENSP00000379140	9606.ENSP00000226574	0	0	0	0	0	0	0	0.509	0	0.509
PPARG	CDKN1A	1847090	1843736	9606.ENSP00000287820	9606.ENSP00000244741	0	0	0	0	0	0	0	0.508	0	0.508
HIF1A	PPARG	1852062	1847090	9606.ENSP00000338018	9606.ENSP00000287820	0	0	0	0	0	0	0	0.508	0	0.508
PPARG	MMP2	1847090	1842719	9606.ENSP00000287820	9606.ENSP00000219070	0	0	0	0	0	0	0	0.507	0	0.507
JUN	CYP19A1	1855436	1844790	9606.ENSP00000360266	9606.ENSP00000260433	0	0	0	0	0	0	0	0.507	0	0.507
TOP2A	EGFR	1860923	1846445	9606.ENSP00000411532	9606.ENSP00000275493	0	0	0	0	0	0	0	0.505	0	0.505
MAPK8	ESR1	1853988	1842435	9606.ENSP00000353483	9606.ENSP00000206249	0	0	0	0	0	0	0	0.505	0	0.505
VEGFA	XIAP	1855611	1853225	9606.ENSP00000361125	9606.ENSP00000347858	0	0	0	0	0	0	0	0.504	0	0.504
CXCL12	JUN	1858332	1855436	9606.ENSP00000379140	9606.ENSP00000360266	0	0	0	0	0	0	0	0.503	0	0.503
CDKN1A	MMP2	1843736	1842719	9606.ENSP00000244741	9606.ENSP00000219070	0	0	0	0	0	0	0	0.503	0	0.503
JAK2	VEGFA	1857411	1855611	9606.ENSP00000371067	9606.ENSP00000361125	0	0	0	0	0	0	0	0.502	0	0.502
IGF1R	CDKN1B	1845984	1843169	9606.ENSP00000268035	9606.ENSP00000228872	0	0	0	0	0	0	0	0.501	0	0.501
PPARG	CYP19A1	1847090	1844790	9606.ENSP00000287820	9606.ENSP00000260433	0	0	0	0	0	0	0	0.500	0	0.499
PARP1	CDK2	1854450	1845906	9606.ENSP00000355759	9606.ENSP00000266970	0	0	0	0	0.070	0.309	0	0.279	0	0.496
KDR	ABCG2	1845437	1843466	9606.ENSP00000263923	9606.ENSP00000237612	0	0	0	0	0	0	0	0.495	0	0.495
JAK2	ESR1	1857411	1842435	9606.ENSP00000371067	9606.ENSP00000206249	0	0	0	0	0	0.063	0	0.480	0	0.491
IGF1R	NFKB1	1845984	1843094	9606.ENSP00000268035	9606.ENSP00000226574	0	0	0	0	0	0.110	0	0.450	0	0.489
TOP2A	ESR1	1860923	1842435	9606.ENSP00000411532	9606.ENSP00000206249	0	0	0	0	0	0.063	0	0.472	0	0.484
PTGS2	MMP2	1854602	1842719	9606.ENSP00000356438	9606.ENSP00000219070	0	0	0	0	0	0	0	0.483	0	0.483
TGFBR1	JUN	1856216	1855436	9606.ENSP00000364133	9606.ENSP00000360266	0	0	0	0	0	0.149	0	0.415	0	0.481
FGFR1	HSP90AA1	1859710	1851814	9606.ENSP00000393312	9606.ENSP00000335153	0	0	0	0	0	0.277	0	0.311	0	0.481
PTGS2	ESR1	1854602	1842435	9606.ENSP00000356438	9606.ENSP00000206249	0	0	0	0	0	0	0	0.479	0	0.479
TOP2A	ATR	1860923	1852735	9606.ENSP00000411532	9606.ENSP00000343741	0	0	0	0	0	0.305	0	0.282	0	0.479
JUN	ATR	1855436	1852735	9606.ENSP00000360266	9606.ENSP00000343741	0	0	0	0	0	0.214	0	0.363	0	0.478
CHEK1	PARP1	1859362	1854450	9606.ENSP00000388648	9606.ENSP00000355759	0	0	0	0	0	0	0	0.475	0	0.475
CYP1A1	JUN	1857086	1855436	9606.ENSP00000369050	9606.ENSP00000360266	0	0	0	0	0	0	0	0.475	0	0.475
VEGFA	CDKN1B	1855611	1843169	9606.ENSP00000361125	9606.ENSP00000228872	0	0	0	0	0	0	0	0.474	0	0.474
VEGFA	TERT	1855611	1849199	9606.ENSP00000361125	9606.ENSP00000309572	0	0	0	0	0	0	0	0.473	0	0.473
CHEK1	JUN	1859362	1855436	9606.ENSP00000388648	9606.ENSP00000360266	0	0	0	0	0	0	0	0.472	0	0.472
ABCG2	ESR1	1843466	1842435	9606.ENSP00000237612	9606.ENSP00000206249	0	0	0	0	0	0	0	0.472	0	0.472
IGF1R	CDKN1A	1845984	1843736	9606.ENSP00000268035	9606.ENSP00000244741	0	0	0	0	0	0	0	0.472	0	0.472
CHEK1	CDKN1B	1859362	1843169	9606.ENSP00000388648	9606.ENSP00000228872	0	0	0	0	0	0	0	0.471	0	0.471
CYP1A1	ESR2	1857086	1852756	9606.ENSP00000369050	9606.ENSP00000343925	0	0	0	0	0	0	0	0.471	0	0.471
XIAP	CDKN1B	1853225	1843169	9606.ENSP00000347858	9606.ENSP00000228872	0	0	0	0	0	0	0	0.470	0	0.470
ATR	EGFR	1852735	1846445	9606.ENSP00000343741	9606.ENSP00000275493	0	0	0	0	0	0.293	0	0.278	0	0.468
MAPK8	KDR	1853988	1845437	9606.ENSP00000353483	9606.ENSP00000263923	0	0	0	0	0	0.107	0	0.429	0	0.468
HIF1A	IGF1R	1852062	1845984	9606.ENSP00000338018	9606.ENSP00000268035	0	0	0	0	0	0	0	0.463	0	0.463
TGFBR1	EGFR	1856216	1846445	9606.ENSP00000364133	9606.ENSP00000275493	0	0	0	0	0	0.110	0	0.419	0	0.461
JAK2	CDKN1A	1857411	1843736	9606.ENSP00000371067	9606.ENSP00000244741	0	0	0	0	0	0	0	0.459	0	0.459
PPARG	TLR2	1847090	1844747	9606.ENSP00000287820	9606.ENSP00000260010	0	0	0	0	0	0	0	0.459	0	0.459
PPARG	CDKN1B	1847090	1843169	9606.ENSP00000287820	9606.ENSP00000228872	0	0	0	0	0	0	0	0.460	0	0.459
CHEK1	EGFR	1859362	1846445	9606.ENSP00000388648	9606.ENSP00000275493	0	0	0	0	0	0	0	0.460	0	0.459
MDM2	CDKN1B	1861282	1843169	9606.ENSP00000417281	9606.ENSP00000228872	0	0	0	0	0	0	0	0.457	0	0.457
PPARG	IGF1R	1847090	1845984	9606.ENSP00000287820	9606.ENSP00000268035	0	0	0	0	0	0.063	0	0.441	0	0.454
FGFR1	JUN	1859710	1855436	9606.ENSP00000393312	9606.ENSP00000360266	0	0	0	0	0	0.077	0	0.426	0	0.448
MAPK8	HIF1A	1853988	1852062	9606.ENSP00000353483	9606.ENSP00000338018	0	0	0	0	0	0	0	0.443	0	0.443
VEGFA	CDK2	1855611	1845906	9606.ENSP00000361125	9606.ENSP00000266970	0	0	0	0	0	0.082	0	0.419	0	0.443
TOP2A	PARP1	1860923	1854450	9606.ENSP00000411532	9606.ENSP00000355759	0	0	0	0	0	0	0	0.441	0	0.441
JAK2	MMP2	1857411	1842719	9606.ENSP00000371067	9606.ENSP00000219070	0	0	0	0	0	0	0	0.437	0	0.437
HSP90AA1	CDKN1B	1851814	1843169	9606.ENSP00000335153	9606.ENSP00000228872	0	0	0	0	0	0	0	0.436	0	0.437
XIAP	ESR1	1853225	1842435	9606.ENSP00000347858	9606.ENSP00000206249	0	0	0	0	0	0.089	0	0.407	0	0.436
HSP90AA1	PPARG	1851814	1847090	9606.ENSP00000335153	9606.ENSP00000287820	0	0	0	0	0	0.081	0	0.411	0	0.436
JUN	CCNE1	1855436	1845190	9606.ENSP00000360266	9606.ENSP00000262643	0	0	0	0	0	0	0	0.435	0	0.435
PTPN11	NFKB1	1852389	1843094	9606.ENSP00000340944	9606.ENSP00000226574	0	0	0	0	0	0.087	0	0.407	0	0.435
TOP2A	ABCG2	1860923	1843466	9606.ENSP00000411532	9606.ENSP00000237612	0	0	0	0	0	0	0	0.432	0	0.432
TGFBR1	KDR	1856216	1845437	9606.ENSP00000364133	9606.ENSP00000263923	0	0	0	0	0	0.149	0	0.359	0	0.431
FGFR1	ESR1	1859710	1842435	9606.ENSP00000393312	9606.ENSP00000206249	0	0	0	0	0	0.063	0	0.417	0	0.430
PPARG	KDR	1847090	1845437	9606.ENSP00000287820	9606.ENSP00000263923	0	0	0	0	0	0.063	0	0.416	0	0.429
PTPN11	CDK2	1852389	1845906	9606.ENSP00000340944	9606.ENSP00000266970	0	0	0	0	0	0.194	0	0.320	0	0.428
TOP2A	CCNE1	1860923	1845190	9606.ENSP00000411532	9606.ENSP00000262643	0	0	0	0	0.141	0	0	0.361	0	0.427
CYP1A1	ABCG2	1857086	1843466	9606.ENSP00000369050	9606.ENSP00000237612	0	0	0	0	0	0	0	0.425	0	0.425
CYP19A1	CDKN1B	1844790	1843169	9606.ENSP00000260433	9606.ENSP00000228872	0	0	0	0	0	0	0	0.424	0	0.424
EGFR	CCNE1	1846445	1845190	9606.ENSP00000275493	9606.ENSP00000262643	0	0	0	0	0	0	0	0.424	0	0.424
JUN	PARP1	1855436	1854450	9606.ENSP00000360266	9606.ENSP00000355759	0	0	0	0	0	0	0	0.421	0	0.421
MAP2K1	CDK2	1848411	1845906	9606.ENSP00000302486	9606.ENSP00000266970	0	0	0.344	0.738	0	0.260	0	0.575	0	0.420
JAK2	TLR2	1857411	1844747	9606.ENSP00000371067	9606.ENSP00000260010	0	0	0	0	0	0.100	0	0.382	0	0.420
JAK2	MAPK8	1857411	1853988	9606.ENSP00000371067	9606.ENSP00000353483	0	0	0	0.626	0	0.107	0	0.936	0	0.419
PTGS2	KDR	1854602	1845437	9606.ENSP00000356438	9606.ENSP00000263923	0	0	0	0	0	0	0	0.417	0	0.417
PARP1	HSP90AA1	1854450	1851814	9606.ENSP00000355759	9606.ENSP00000335153	0	0	0	0	0	0.085	0	0.387	0	0.416
CXCL12	IL1B	1858332	1845335	9606.ENSP00000379140	9606.ENSP00000263341	0	0	0	0	0	0	0	0.416	0	0.416
PTGS2	CDKN1A	1854602	1843736	9606.ENSP00000356438	9606.ENSP00000244741	0	0	0	0	0	0	0	0.415	0	0.415
TGFBR1	VEGFA	1856216	1855611	9606.ENSP00000364133	9606.ENSP00000361125	0	0	0	0	0	0	0	0.415	0	0.414
CXCL12	TLR2	1858332	1844747	9606.ENSP00000379140	9606.ENSP00000260010	0	0	0	0	0	0	0	0.415	0	0.414
GSTM1	CYP19A1	1849425	1844790	9606.ENSP00000311469	9606.ENSP00000260433	0	0	0	0	0	0	0	0.414	0	0.414
CCNE1	ESR1	1845190	1842435	9606.ENSP00000262643	9606.ENSP00000206249	0	0	0	0	0	0	0	0.415	0	0.414
TGFBR1	MMP2	1856216	1842719	9606.ENSP00000364133	9606.ENSP00000219070	0	0	0	0	0	0	0	0.414	0	0.414
VEGFA	CYP19A1	1855611	1844790	9606.ENSP00000361125	9606.ENSP00000260433	0	0	0	0	0	0	0	0.414	0	0.414
MDM2	NFKB1	1861282	1843094	9606.ENSP00000417281	9606.ENSP00000226574	0	0	0	0	0	0	0	0.415	0	0.414
JAK2	PPARG	1857411	1847090	9606.ENSP00000371067	9606.ENSP00000287820	0	0	0	0	0	0.063	0	0.400	0	0.413
KDR	CDKN1A	1845437	1843736	9606.ENSP00000263923	9606.ENSP00000244741	0	0	0	0	0	0	0	0.412	0	0.412
CXCL12	IGF1R	1858332	1845984	9606.ENSP00000379140	9606.ENSP00000268035	0	0	0	0	0	0	0	0.413	0	0.412
VEGFA	TLR2	1855611	1844747	9606.ENSP00000361125	9606.ENSP00000260010	0	0	0	0	0	0	0	0.413	0	0.412
MDM2	VEGFA	1861282	1855611	9606.ENSP00000417281	9606.ENSP00000361125	0	0	0	0	0	0	0	0.410	0	0.410
TERT	CDK2	1849199	1845906	9606.ENSP00000309572	9606.ENSP00000266970	0	0.003	0	0	0	0	0	0.409	0	0.408
ESR2	NFKB1	1852756	1843094	9606.ENSP00000343925	9606.ENSP00000226574	0	0	0	0	0	0	0	0.407	0	0.407
PTGS2	CDKN1B	1854602	1843169	9606.ENSP00000356438	9606.ENSP00000228872	0	0	0	0	0	0	0	0.407	0	0.407
PARP1	XIAP	1854450	1853225	9606.ENSP00000355759	9606.ENSP00000347858	0	0	0	0	0	0	0	0.407	0	0.407
VEGFA	ATR	1855611	1852735	9606.ENSP00000361125	9606.ENSP00000343741	0	0	0	0	0	0	0	0.407	0	0.407
CDK2	MMP2	1845906	1842719	9606.ENSP00000266970	9606.ENSP00000219070	0	0	0	0	0	0	0	0.400	0	0.400
